# Supplementary material for: Annoyance in Response to Vibrations from Railways
Source: PubMed Central journal article supplement (PMC6163999; doi:10.3390/ijerph15091887), 2018-08-31
Supplement: ijerph-15-01887-s001.pdf [file ijerph-15-01887-s001.pdf]

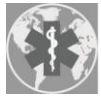

# Supplementary Materials: Annoyance in Response to Vibrations from Railways

## Pilot study

A pilot study was conducted in October 2016. A total of 300 questionnaires were distributed to 300 households in the municipalities of Bollebygd, Olsfors and Hultafors west of Gothenburg, Sweden. Properties within 50m of the railway were selected. Participants were aged over 18 years. One participant per household was asked to respond. If more than one person was resident in the household, the person with a birthday closest to 18/10/16 (date of printing) to respond.

Sixty-two questionnaires were returned, giving a response rate of 21%.

## Response rate main study

Table S1 shows the total response rate and response rate stratified by distance from the railway. In total 7,679 (21.9%) individuals completed a questionnaire. Of these, 6,894 (19.7%) gave their written consent to be in the study and are included in the analysis. There was a positive correlation between proximity to the railway and response rate. The highest rate was within 50m of the railway (29.4%). There was a steady decline in response to 16.4% in those individuals living over 500m from a railway.

**Table S1.** Overview of response in relation to distance from the railway.

| Distance to the Railway Track (m) | Number of People Invited | Number of People that Returned a Completed Questionnaire | Number of People that Completed the Consent Form |
|-----------------------------------|--------------------------|----------------------------------------------------------|--------------------------------------------------|
| < 50                              | 694                      | 216 (31.1%)                                              | 197 (28.4%)                                      |
| 50 – 100                          | 1729                     | 528 (30.5%)                                              | 471 (27.2%)                                      |
| 100 – 200                         | 4646                     | 1157 (24.9%)                                             | 1027 (22.1%)                                     |
| 200 – 300                         | 4985                     | 1194 (24.0%)                                             | 1082 (21.7%)                                     |
| 300 – 500                         | 8089                     | 1870 (23.1%)                                             | 1686 (20.8%)                                     |
| ≥500                              | 13,308                   | 2434 (18.3%)                                             | 2185 (16.4%)                                     |
| Unknown                           | 1560                     | 280 (17.9%)                                              | 246 (15.8%)                                      |
| <b>Total</b>                      | <b>35,011</b>            | <b>7679 (21.9%)</b>                                      | <b>6894 (19.7%)</b>                              |

Comparison between responders and non-responders showed some selection bias.

Results main study

Table S2. Odds of being annoyed by vibrations stratified by distance and train type with moderating factors (full version of Table 3).

| Type of train | Distance | Model 1<br>OR (95%CI) | Model 2<br>OR (95%CI) | Model 3<br>OR (95%CI) | Model 4<br>OR (95%CI) | Model 5<br>OR (95%CI) | Model 6<br>OR (95%CI) | Model 7<br>OR (95%CI) | Model 8<br>OR (95%CI) | Model 9<br>OR (95%CI) | Model 10<br>OR (95%CI) |
|---------------|----------|-----------------------|-----------------------|-----------------------|-----------------------|-----------------------|-----------------------|-----------------------|-----------------------|-----------------------|------------------------|
| Passenger     | <100     | 6.2 (4.5-8.4)*        | 2.8 (1.9-3.9)*        | 2.8 (2.0-3.9)*        | 2.8 (2.0-3.9)*        | 2.7 (1.9-3.8)*        | 2.4 (1.7-3.5)*        | 2.1 (1.4-3.1)*        | 2.0 (1.3-2.9)*        | 1.7 (1.2-2.6)*        | 1.7 (1.2-2.6)*         |
|               | 100-200  | 3.9 (2.8-5.2)*        | 2.2 (1.6-3.1)*        | 2.2 (1.6-3.1)*        | 2.2 (1.6-3.0)*        | 2.0 (1.4-2.9)*        | 2.0 (1.4-2.8)*        | 1.7 (1.2-2.5)*        | 1.7 (1.2-2.5)*        | 1.6 (1.1-2.3)*        | 1.6 (1.1-2.4)*         |
|               | 200-300  | 2.1 (1.5-2.8)*        | 1.4 (1.0-2.0)*        | 1.4 (1.0-2.0)         | 1.4 (1.0-2.0)         | 1.4 (1.0-2.0)         | 1.4 (1.0-2.1)         | 1.4 (1.0-2.1)         | 1.4 (1.0-2.1)         | 1.3 (1.0-2.0)         | 1.3 (1.0-2.0)          |
|               | 300-400  | 1.3 (0.9-1.8)         | 0.9 (0.7-1.4)         | 1.0 (0.7-1.4)         | 1.0 (0.7-1.4)         | 1.0 (0.7-1.5)         | 1.0 (0.7-1.6)         | 1.1 (0.7-1.6)         | 1.1 (0.7-1.6)         | 1.0 (0.7-1.6)         | 1.0 (0.7-1.6)          |
|               | 400-500  | 1.2 (0.8-1.8)         | 0.9 (0.6-1.5)         | 1.0 (0.6-1.4)         | 1.0 (0.6-1.5)         | 1.0 (0.6-1.5)         | 1.0 (0.6-1.5)         | 1.0 (0.6-1.5)         | 1.0 (0.6-1.5)         | 1.0 (0.6-1.6)         | 1.0 (0.6-1.6)          |
| Freight       | <100     | 18.2 (13.9-23.7)*     | 6.9 (5.1-9.2)*        | 6.9 (5.1-9.2)*        | 6.9 (5.1-9.2)*        | 6.8 (5.0-9.2)*        | 6.5 (4.8-8.9)*        | 6.0 (4.4-8.2)*        | 5.6 (4.1-7.7)*        | 5.2 (3.7-7.3)*        | 5.3 (3.8-7.4)*         |
|               | 100-200  | 7.0 (5.4-9.0)*        | 3.6 (2.6-4.7)*        | 3.6 (2.7-4.7)*        | 3.5 (2.7-4.7)*        | 3.5 (2.6-4.6)*        | 3.4 (2.5-4.5)*        | 3.0 (2.3-4.1)*        | 3.0 (2.2-4.0)*        | 3.0 (2.2-4.1)*        | 3.1 (2.2-4.2)*         |
|               | 200-300  | 3.0 (2.6-4.3)*        | 2.1 (1.6-2.8)*        | 2.1 (1.6-2.8)*        | 2.1 (1.6-2.8)*        | 2.1 (1.6-2.9)*        | 2.2 (1.6-2.9)*        | 2.1 (1.5-2.8)*        | 2.1 (1.5-2.8)*        | 2.0 (1.5-2.8)*        | 2.0 (1.5-2.8)*         |
|               | 300-400  | 1.9 (1.5-2.6)*        | 1.3 (1.0-1.8)         | 1.3 (1.0-1.8)         | 1.3 (1.0-1.8)         | 1.4 (1.0-1.9)         | 1.4 (1.0-2.0)         | 1.4 (1.0-2.0)         | 1.5 (1.1-2.1)*        | 1.5 (1.0-2.1)*        | 1.5 (1.1-2.1)*         |
|               | 400-500  | 1.4 (1.0-2.0)         | 1.1 (0.8-1.5)         | 1.1 (0.8-1.5)         | 1.1 (0.8-1.5)         | 1.1 (0.7-1.5)         | 1.1 (0.7-1.5)         | 1.0 (0.7-1.5)         | 1.1 (0.7-1.6)         | 1.1 (0.7-1.6)         | 1.1 (0.8-1.7)          |
| Fast          | <100     | 8.2 (6.0-11.4)*       | 4.0 (2.5-5.1)*        | 3.6 (2.5-5.1)*        | 3.6 (2.5-5.1)*        | 3.3 (2.3-4.8)*        | 3.3 (2.2-4.8)*        | 2.8 (1.9-4.1)*        | 2.6 (1.7-3.9)*        | 2.4 (1.6-3.6)*        | 2.3 (1.5-3.6)*         |
|               | 100-200  | 4.5 (3.3-6.2)*        | 2.5 (1.8-3.5)*        | 2.5 (1.8-3.5)*        | 2.5 (1.8-3.5)*        | 2.3 (1.6-3.3)*        | 2.2 (1.5-3.2)*        | 1.9 (1.3-2.9)*        | 1.9 (1.3-2.8)*        | 1.8 (1.2-2.7)*        | 1.9 (1.2-2.8)*         |
|               | 200-300  | 2.2 (1.6-3.2)*        | 1.5 (1.0-2.2)*        | 1.5 (1.0-2.2)*        | 1.5 (1.0-2.1)*        | 1.4 (1.0-2.1)         | 1.6 (1.1-2.3)*        | 1.5 (1.0-2.3)*        | 1.5 (1.0-2.3)*        | 1.4 (0.9-2.2)         | 1.4 (0.9-2.2)          |
|               | 300-400  | 1.6 (1.1-2.3)*        | 1.2 (0.8-1.7)         | 1.2 (0.8-1.7)         | 1.2 (0.8-1.8)         | 1.2 (0.8-1.9)         | 1.3 (0.9-2.0)         | 1.3 (0.9-2.0)         | 1.4 (0.9-2.1)         | 1.3 (0.9-2.0)         | 1.3 (0.8-2.0)          |
|               | 400-500  | 1.3 (0.9-2.0)         | 1.1 (0.7-1.7)         | 1.1 (0.7-1.7)         | 1.1 (0.7-1.7)         | 1.1 (0.7-1.7)         | 1.1 (0.7-1.8)         | 1.1 (0.7-1.8)         | 1.1 (0.7-1.8)         | 1.1 (0.7-1.8)         | 1.1 (0.7-1.9)          |
| Diesel        | <100     | 16.3 (12.2-21.9)*     | 7.1 (5.1-9.8)*        | 7.1 (5.1-9.8)*        | 7.1 (5.1-9.9)*        | 7.0 (5.0-9.7)*        | 6.7 (4.8-9.5)*        | 6.1 (4.3-8.7)*        | 5.9 (4.2-8.5)*        | 5.4 (3.7-7.8)*        | 5.3 (3.6-7.6)*         |
|               | 100-200  | 6.3 (4.7-8.4)*        | 3.5 (2.6-4.9)*        | 3.5 (2.6-4.8)*        | 3.5 (2.6-4.8)*        | 3.4 (2.4-4.6)*        | 3.4 (2.4-4.7)*        | 3.0 (2.2-4.3)*        | 3.1 (2.2-4.3)*        | 2.9 (2.1-4.2)*        | 2.9 (2.0-4.1)*         |
|               | 200-300  | 2.9 (2.1-3.9)*        | 2.0 (1.4-2.7)*        | 2.0 (1.4-2.7)*        | 2.0 (1.4-2.7)*        | 1.9 (1.4-2.7)*        | 2.0 (1.4-2.8)*        | 1.9 (1.4-2.8)*        | 2.0 (1.4-2.8)*        | 1.8 (1.3-2.6)*        | 1.8 (1.2-2.6)*         |
|               | 300-400  | 1.9 (1.4-2.6)*        | 1.4 (1.0-2.0)         | 1.4 (1.0-2.0)         | 1.4 (1.0-2.0)         | 1.5 (1.0-2.1)         | 1.5 (1.0-2.1)*        | 1.5 (1.0-2.2)*        | 1.6 (1.1-2.3)*        | 1.5 (1.0-2.2)*        | 1.5 (1.0-2.2)          |
|               | 400-500  | 1.4 (0.9-2.0)         | 1.1 (0.8-1.7)         | 1.1 (0.8-1.7)         | 1.1 (0.7-1.7)         | 1.1 (0.7-1.6)         | 1.1 (0.7-1.7)         | 1.1 (0.7-1.6)         | 1.1 (0.7-1.7)         | 1.1 (0.7-1.7)         | 1.1 (0.7-1.7)          |
| Maintenance   | <100     | 15.2 (11.1-20.7)*     | 7.7 (5.5-10.8)*       | 7.7 (5.5-10.8)*       | 7.7 (5.5-10.8)*       | 7.6 (5.3-10.7)*       | 7.2 (5.1-10.4)*       | 6.7 (4.7-9.7)*        | 6.4 (4.4-9.3)*        | 6.0 (4.1-8.8)*        | 5.8 (4.0-8.5)*         |
|               | 100-200  | 5.9 (4.3-8.0)*        | 3.7 (2.7-5.2)*        | 3.7 (2.7-5.2)*        | 3.7 (2.6-5.2)*        | 3.5 (2.5-5.0)*        | 3.5 (2.5-5.0)*        | 3.3 (2.3-4.7)*        | 3.2 (2.3-4.6)*        | 3.2 (2.2-4.6)*        | 3.2 (2.2-4.6)*         |
|               | 200-300  | 3.1 (2.3-4.3)*        | 2.3 (1.6-3.2)*        | 2.3 (1.6-3.2)*        | 2.3 (1.6-3.2)*        | 2.2 (1.6-3.2)*        | 2.3 (1.6-3.3)*        | 2.2 (1.6-3.2)*        | 2.3 (1.6-3.3)*        | 2.2 (1.5-3.2)*        | 2.1 (1.5-3.1)*         |
|               | 300-400  | 2.1 (1.5-2.9)*        | 1.7 (1.1-2.4)*        | 1.6 (1.1-2.4)*        | 1.7 (1.1-2.4)*        | 1.7 (1.2-2.5)*        | 1.7 (1.2-2.6)*        | 1.7 (1.2-2.6)*        | 1.8 (1.2-2.7)*        | 1.7 (1.1-2.5)*        | 1.6 (1.1-2.5)*         |
|               | 400-500  | 1.6 (1.1-2.4)         | 1.5 (1.0-2.2)         | 1.5 (1.0-2.2)         | 1.5 (1.0-2.2)         | 1.5 (1.0-2.2)         | 1.4 (1.0-2.2)         | 1.4 (1.0-2.2)         | 1.5 (1.0-2.3)         | 1.5 (1.0-2.3)         | 1.4 (1.0-2.3)          |

\*statistically significant

Model 1: crude analysis

Model 2: adjusting for noise annoyance

Model 3: adjusting for noise annoyance, sex

Model 4: adjusting for noise annoyance, sex, age

Model 5: adjusting for noise annoyance, sex, age, worry about health

Model 6: adjusting for noise annoyance, sex, age, worry about health, worry about safety

Model 7: adjusting for noise annoyance, sex, age, worry about health, worry about safety, worry about home

Model 8: adjusting for noise annoyance, sex, age, worry about health, worry about safety, worry about home, vibration expectation

Model 9: adjusting for noise annoyance, sex, age, worry about health, worry about safety, worry about home, vibration expectation, household income

Model 10: adjusting for noise annoyance, sex, age, worry about health, worry about safety, worry about home, vibration expectation, household income, years resident at property

**Table S3.** Odds of being highly annoyed by vibrations stratified by distance and train type with moderating factors (full version of Table 4).

| Type of train | Distance | Model 1<br>OR (95%CI) | Model 2<br>OR (95%CI) | Model 3<br>OR (95%CI) | Model 4<br>OR (95%CI) | Model 5<br>OR (95%CI) | Model 6<br>OR (95%CI) | Model 7<br>OR (95%CI) | Model 8<br>OR (95%CI) | Model 9<br>OR (95%CI) | Model 10<br>OR (95%CI) |
|---------------|----------|-----------------------|-----------------------|-----------------------|-----------------------|-----------------------|-----------------------|-----------------------|-----------------------|-----------------------|------------------------|
| Passenger     | <100     | 43.6 (10.5-180.1)*    | 7.0 (1.7-29.4)*       | 7.0 (1.7-29.4)*       | 7.1 (1.7-29.5)*       | 6.7 (1.6-28.3)*       | 4.5 (1.0-19.1)*       | 3.4 (0.8-14.8)        | 3.1 (0.7-13.5)        | 2.6 (0.6-11.5)        | 2.4 (0.6-10.7)         |
|               | 100-200  | 33.0 (8.0-135.7)*     | 8.8 (2.1-36.5)*       | 8.8 (2.1-36.5)*       | 8.8 (2.1-36.6)*       | 8.5 (2.0-36.2)*       | 6.1 (1.4-25.6)*       | 5.1 (1.2-21.6)*       | 4.7 (1.1-20.1)*       | 4.2 (1.0-17.8)        | 4.2 (1.0-17.9)         |
|               | 200-300  | 10.6 (2.5-45.4)*      | 4.1 (0.9-17.9)        | 4.1 (0.9-18.0)        | 4.1 (0.9-18.0)        | 3.7 (0.8-16.6)        | 2.9 (0.6-13.0)        | 2.6 (0.6-11.7)        | 2.6 (0.6-11.6)        | 2.3 (0.5-10.5)        | 2.3 (0.5-10.5)         |
|               | 300-400  | 5.0 (1.1-23.5)*       | 2.3 (0.5-11.0)        | 2.3 (0.5-11.0)        | 2.3 (0.5-11.0)        | 2.5 (0.5-12.3)        | 1.6 (0.3-8.1)         | 1.5 (0.3-7.9)         | 1.5 (0.3-7.8)         | 1.3 (0.2-6.8)         | 1.3 (0.2-6.8)          |
|               | 400-500  | 4.0 (0.8-20.8)        | 1.9 (0.3-10.4)        | 1.9 (0.3-10.4)        | 1.9 (0.3-10.4)        | 2.3 (0.4-13.1)        | 1.8 (0.3-10.1)        | 1.6 (0.3-9.1)         | 1.6 (0.3-9.1)         | 1.6 (0.3-9.2)         | 1.6 (0.3-9.2)          |
| Freight       | <100     | 48.7 (27.6-86.1)*     | 10.4 (5.8-18.8)*      | 10.4 (5.8-18.8)*      | 10.4 (5.8-18.8)*      | 11.9 (6.2-22.9)*      | 9.5 (5.0-18.0)*       | 7.9 (4.1-15.0)*       | 7.1 (3.7-13.7)*       | 7.9 (3.9-16.3)*       | 7.7 (3.8-15.8)*        |
|               | 100-200  | 30.0 (12.4-38.7)*     | 7.5 (4.2-13.5)*       | 7.5 (4.1-13.4)*       | 7.5 (4.1-13.4)*       | 8.2 (4.3-16.7)*       | 6.8 (3.6-12.8)*       | 5.5 (2.9-10.4)*       | 5.1 (2.7-9.8)*        | 5.9 (2.9-12.1)*       | 5.9 (2.9-12.1)*        |
|               | 200-300  | 5.5 (3.0-10.1)*       | 2.3 (1.2-4.4)*        | 2.3 (1.2-4.3)*        | 2.3 (1.2-4.3)*        | 2.5 (1.3-5.0)*        | 2.2 (1.1-4.3)*        | 2.0 (1.0-4.0)*        | 2.0 (1.0-4.0)*        | 2.2 (1.0-4.8)*        | 2.2 (1.0-4.7)*         |
|               | 300-400  | 2.6 (1.3-5.1)*        | 1.3 (0.6-2.5)         | 1.3 (0.6-2.5)         | 1.3 (0.6-2.5)         | 1.4 (0.7-3.0)         | 1.2 (0.6-2.6)         | 1.2 (0.6-2.5)         | 1.2 (0.6-2.5)         | 1.4 (0.6-3.2)         | 1.4 (0.6-3.2)          |
|               | 400-500  | 2.8 (1.4-5.5)*        | 1.8 (0.9-3.6)         | 1.7 (0.9-3.6)         | 1.7 (0.9-3.6)         | 2.2 (1.0-4.7)         | 1.8 (0.9-3.9)         | 1.7 (0.8-3.7)         | 1.7 (0.8-3.8)         | 2.0 (0.9-4.7)         | 2.0 (0.9-4.7)          |
| Fast          | <100     | 36.1 (11.3-115.9)*    | 6.0 (1.8-19.5)*       | 6.0 (1.8-19.5)*       | 6.0 (1.9-19.6)*       | 5.9 (1.8-19.6)*       | 3.9 (1.2-13.0)*       | 3.0 (0.9-10.0)        | 2.6 (0.8-8.8)         | 2.3 (0.7-7.9)         | 2.1 (0.6-7.3)          |
|               | 100-200  | 24.5 (7.7-78.4)*      | 6.6 (2.0-21.4)*       | 6.6 (2.0-21.4)*       | 6.6 (2.0-21.5)*       | 6.2 (1.9-20.6)*       | 4.5 (1.4-14.8)*       | 3.7 (1.1-12.3)*       | 3.4 (1.0-11.2)*       | 3.2 (1.0-10.7)        | 3.1 (0.9-10.3)         |
|               | 200-300  | 8.2 (2.5-27.6)*       | 3.3 (1.0-11.1)        | 3.3 (1.0-11.1)        | 3.3 (1.0-11.2)        | 3.2 (0.9-11.2)        | 2.4 (0.7-8.4)         | 2.2 (0.6-7.2)         | 2.1 (0.6-7.5)         | 2.0 (0.6-7.2)         | 2.0 (0.6-7.1)          |
|               | 300-400  | 4.2 (1.2-15.3)*       | 1.9 (0.5-7.2)         | 1.9 (0.5-7.2)         | 2.0 (0.5-7.3)         | 2.2 (0.6-8.2)         | 1.5 (0.4-5.8)         | 1.4 (0.4-5.6)         | 1.4 (0.4-5.6)         | 1.1 (0.3-4.6)         | 1.1 (0.3-4.6)          |
|               | 400-500  | 3.3 (0.8-13.0)        | 1.6 (0.4-6.7)         | 1.6 (0.4-6.7)         | 1.6 (0.4-6.7)         | 2.0 (0.5-8.5)         | 1.6 (0.4-6.7)         | 1.4 (0.3-6.1)         | 1.4 (0.3-6.1)         | 1.4 (0.3-6.3)         | 1.4 (0.3-6.2)          |
| Diesel        | <100     | 212.3 (52.5-859.1)*   | 43.5 (10.6-177.5)*    | 43.7 (10.7-178.4)*    | 43.8 (10.7-178.9)*    | 42.9 (10.4-177.1)*    | 33.3 (8.1-136.8)*     | 28.0 (6.8-115.3)*     | 25.2 (6.1-104.2)*     | 23.6 (5.7-97.9)*      | 22.7 (5.5-94.2)*       |
|               | 100-200  | 84.7 (20.9-343.1)*    | 26.9 (6.6-109.8)*     | 26.9 (6.6-109.8)*     | 26.9 (6.6-109.8)*     | 25.7 (6.2-106.2)*     | 20.8 (5.1-85.6)*      | 17.6 (4.3-72.5)*      | 16.3 (4.0-67.4)*      | 15.2 (3.7-62.8)*      | 15.0 (3.6-62.1)*       |
|               | 200-300  | 21.9 (5.3-90.8)*      | 9.6 (2.3-40.1)*       | 26.8 (6.6-109.7)*     | 26.9 (6.6-109.8)*     | 25.7 (6.2-106.2)*     | 8.3 (2.0-35.0)*       | 7.4 (1.8-31.4)*       | 7.4 (1.8-31.6)*       | 7.1 (1.7-30.2)*       | 7.1 (1.7-30.1)*        |
|               | 300-400  | 10.8 (2.5-46.8)*      | 5.4 (1.2-23.7)*       | 9.3 (2.2-39.2)*       | 9.3 (2.2-39.2)*       | 9.4 (2.2-40.1)*       | 4.4 (1.0-19.5)        | 4.4 (1.0-19.5)        | 4.4 (1.0-19.7)        | 4.6 (1.0-20.8)*       | 4.6 (1.0-20.8)*        |
|               | 400-500  | 9.0 (2.0-40.7)*       | 5.1 (1.1-23.7)*       | 5.4 (1.2-23.7)*       | 5.4 (1.2-23.8)*       | 5.9 (1.3-26.2)*       | 4.5 (1.0-21.0)        | 4.0 (0.9-19.2)        | 4.1 (0.9-19.3)        | 4.0 (0.8-19.3)        | 4.0 (0.8-19.0)         |
| Maintenance   | <100     | 57.2 (23.3-140.7)*    | 13.6 (5.4-33.8)*      | 13.7 (5.5-34.1)*      | 13.7 (5.5-34.2)*      | 13.0 (5.2-32.5)*      | 10.8 (4.3-27.3)*      | 9.8 (3.9-24.8)*       | 8.7 (3.4-22.0)*       | 8.2 (3.2-21.0)*       | 8.0 (3.1-20.3)*        |
|               | 100-200  | 25.6 (10.4-63.2)*     | 9.0 (3.6-22.4)*       | 8.9 (3.6-22.3)*       | 8.9 (3.6-22.3)*       | 8.2 (3.3-20.6)*       | 7.1 (2.8-18.0)*       | 6.5 (2.6-16.5)*       | 6.0 (2.4-15.2)*       | 5.8 (2.3-14.8)*       | 5.8 (2.3-14.7)*        |
|               | 200-300  | 11.2 (4.4-28.1)*      | 5.3 (2.1-13.6)*       | 5.1 (2.0-13.1)*       | 5.1 (2.0-13.1)*       | 4.9 (1.9-12.7)*       | 4.7 (1.8-12.1)*       | 4.6 (1.8-11.8)*       | 4.5 (1.7-11.5)*       | 4.4 (1.7-11.4)*       | 4.4 (1.7-11.3)*        |
|               | 300-400  | 5.3 (2.0-14.2)*       | 2.8 (1.0-7.5)*        | 2.8 (1.0-7.5)*        | 2.8 (1.0-7.5)*        | 2.9 (1.1-7.8)*        | 2.5 (0.9-6.9)         | 2.5 (0.9-6.9)         | 2.5 (0.9-6.9)         | 2.5 (0.9-7.0)         | 2.5 (0.9-6.9)          |
|               | 400-500  | 3.9 (1.4-11.3)*       | 2.6 (0.9-7.6)*        | 2.6 (0.9-7.4)         | 2.6 (0.9-7.5)         | 2.5 (0.9-7.4)         | 2.1 (0.7-6.3)         | 2.1 (0.7-6.1)         | 2.0 (0.7-6.1)         | 2.1 (0.7-6.1)         | 2.0 (0.7-6.1)          |

\*statistically significant

Model 1: crude analysis

Model 2: adjusting for noise annoyance

Model 3: adjusting for noise annoyance, sex

Model 4: adjusting for noise annoyance, sex, age

Model 5: adjusting for noise annoyance, sex, age, worry about health

Model 6: adjusting for noise annoyance, sex, age, worry about health, worry about safety

Model 7: adjusting for noise annoyance, sex, age, worry about health, worry about safety, worry about home

Model 8: adjusting for noise annoyance, sex, age, worry about health, worry about safety, worry about home, vibration expectation

Model 9: adjusting for noise annoyance, sex, age, worry about health, worry about safety, worry about home, vibration expectation, household income

Model 10: adjusting for noise annoyance, sex, age, worry about health, worry about safety, worry about home, vibration expectation, household income, years resident at property
